# Supplementary material for: Seaweed-derived polymeric materials for multiapplications including marine algal cultivation
Source: Royal Society of Chemistry journal article supplement (doi:10.1039/c5ra00929d), 2015-01-01
Supplement: c5ra00929d1.pdf [file c5ra00929d1.pdf]

## **Supporting Information**

### **Contents**

**Figure S1.** Repeating disaccharide unit of vinyl acetate, agar and *kappa*-carrageenan.

**Table S1a.** Effect of KPS initiator on the grafting parameters.<sup>a</sup>

**Table S1b.** Effect of vinyl acetate (VAc) monomer on the grafting parameters.<sup>a</sup>

**Table S1c.** Effect of temperature on the grafting parameters.<sup>a</sup>

**Table S1d.** Effect of reaction time on the grafting parameters.<sup>a</sup>

**Table S2.** Effect of phycocolloids keeping constant vinyl acetate as monomer.\*

**Table S3.** Effect of monomers keeping constant *G. dura* agar (*AgrGd*) as phycocolloid.\*

**Figure S2.** Swelling behavior of the control *AgrGd*,  $\kappa$ C, and polymeric material made of *AgrGd*-g-PVAc. <sup>a</sup>dispersion was started after 12 h in the control *AgrGd* and  $\kappa$ C, <sup>b</sup>no weight loss was observed in *AgrGd*-g-PVAc up to 10 day; <sup>c</sup>dispersion was started after 24 h in the  $\kappa$ C-g-PVAc.

**Figure S3.** FTIR spectra of poly(vinyl acetate) (PVAc).

**Figure S4.** Tensile strength of (a) control agar, (b) *AgrGd*-g-PVAc, (c) control  $\kappa$ C, and (d)  $\kappa$ C-g-PVAc.

**Figure S5.** SEM images of (a) *G. dura* agar, (b) *AgrGd*-g-PVAc, (c)  $\kappa$ C and (d)  $\kappa$ C-g-PVAc.

**Figure S6a.** Biodegradation of the control polyvinyl acetate (PVAc), grafted *Gracilaria dura* agar product (*AgrGd*-g-PVAc), and grafted carrageenan product ( $\kappa$ C-g-PVAc) in soil conditions.

**Figure S6b.** Biodegradation of thin film prepared from grafted *Gracilaria dura* agar product (*AgrGd*-g-PVAc) in soil conditions.

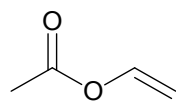

Vinyl acetate

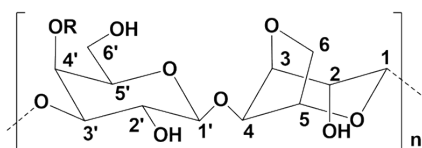

R = H/-OCH<sub>3</sub>/-OSO<sub>3</sub>

Agar

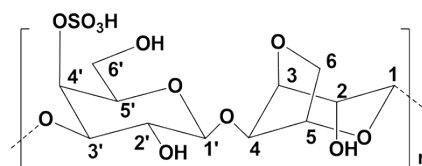

Kappa-carrageenan

**Figure S1.** Repeating disaccharide unit of vinyl acetate, agar and *kappa*-carrageenan.

**Table S1a. Effect of KPS initiator on the grafting parameters.<sup>a</sup>**

| Product      | Weight<br>(AgrGd:<br>w/w) | ratios<br>VAc, | KPS (wt%)   | Yield* (g, %)       | % Grafting<br>efficiency (%E) <sup>b</sup> | % Grafting<br>(%G) <sup>c</sup> |
|--------------|---------------------------|----------------|-------------|---------------------|--------------------------------------------|---------------------------------|
| AgrGd-g-PVAc | 1: 2                      |                | 0.01        | 4.1 (68 ± 1)        | 70 ± 1                                     | 70 ± 1                          |
| AgrGd-g-PVAc | <b>1: 2</b>               |                | <b>0.02</b> | <b>5.3 (88 ± 1)</b> | <b>82 ± 1</b>                              | <b>165 ± 1</b>                  |
| AgrGd-g-PVAc | 1: 2                      |                | 0.03        | 5.2 (87 ± 1)        | 80 ± 1                                     | 160 ± 1                         |
| AgrGd-g-PVAc | 1: 2                      |                | 0.04        | 5.0 (83 ± 1)        | 75 ± 1                                     | 150 ± 1                         |
| κC-g-PVAc    | 1: 2                      |                | 0.01        | 3.2 (80 ± 1)        | 60 ± 1                                     | 60 ± 1                          |
| κC-g-PVAc    | <b>1: 2</b>               |                | <b>0.02</b> | <b>5.2 (87 ± 1)</b> | <b>80 ± 1</b>                              | <b>160 ± 1</b>                  |
| κC-g-PVAc    | 1: 2                      |                | 0.03        | 5.2 (87 ± 1)        | 80 ± 1                                     | 160 ± 1                         |
| κC-g-PVAc    | 1: 2                      |                | 0.04        | 5.1 (86 ± 1)        | 78 ± 1                                     | 155 ± 1                         |

<sup>a</sup>Based on the charged amount of phycocolloid and VAc; <sup>a</sup>glycerol was 0.5 wt%; <sup>b</sup>(Wt. of PVAc grafted/ wt. of κC) x 100; <sup>c</sup>(Wt. of PVAc grafted/ total wt. of VAc) x 100.<sup>[15]</sup>

**Table S1b. Effect of vinyl acetate (VAc) monomer on the grafting parameters.<sup>a</sup>**

| Product      | Weight<br>(AgrGd:<br>w/w) | ratios<br>VAc, | KPS (wt%)   | Yield* (g, %)       | % Grafting<br>efficiency (%E) <sup>b</sup> | % Grafting<br>(%G) <sup>c</sup> |
|--------------|---------------------------|----------------|-------------|---------------------|--------------------------------------------|---------------------------------|
| AgrGd-g-PVAc | 1: 1                      |                | 0.02        | 3.3 (82 ± 1)        | 70 ± 1                                     | 70 ± 1                          |
| AgrGd-g-PVAc | <b>1: 2</b>               |                | <b>0.02</b> | <b>5.3 (88 ± 1)</b> | <b>82 ± 1</b>                              | <b>165 ± 1</b>                  |
| AgrGd-g-PVAc | 1: 3                      |                | 0.02        | 5.5 (68 ± 1)        | 58 ± 1                                     | 175 ± 1                         |
| κC-g-PVAc    | 1: 1                      |                | 0.02        | 3.2 (80 ± 1)        | 60 ± 1                                     | 60 ± 1                          |
| κC-g-PVAc    | <b>1: 2</b>               |                | <b>0.02</b> | <b>5.2(87± 1)</b>   | <b>80 ± 1</b>                              | <b>160 ± 1</b>                  |
| κC-g-PVAc    | 1: 3                      |                | 0.02        | 5.7 (71 ± 1)        | 60 ± 1                                     | 180 ± 1                         |

<sup>a</sup>Based on the charged amount of phycocolloid and VAc; <sup>a</sup>glycerol was 0.5 wt%; <sup>b</sup>(Wt. of PVAc grafted/ wt. of κC) x 100; <sup>c</sup>(Wt. of PVAc grafted/ total wt. of VAc) x 100.<sup>[15]</sup>

**Table S1c. Effect of temperature on the grafting parameters.<sup>a</sup>**

| Product      | Weight ratios<br>(AgrGd: VAc,<br>w/w) | KPS<br>(wt%) | Temp.<br>(°C) | Yield*<br>(g, %)    | % Grafting<br>efficiency<br>(%E) <sup>b</sup> | % Grafting<br>(%G) <sup>c</sup> |
|--------------|---------------------------------------|--------------|---------------|---------------------|-----------------------------------------------|---------------------------------|
| AgrGd-g-PVAc | 1: 2                                  | 0.02         | 70            | 4.8 (80 ± 1)        | 70 ± 1                                        | 140 ± 1                         |
| AgrGd-g-PVAc | <b>1: 2</b>                           | <b>0.02</b>  | <b>75</b>     | <b>5.3 (88 ± 1)</b> | <b>82 ± 1</b>                                 | <b>164 ± 1</b>                  |
| AgrGd-g-PVAc | 1: 2                                  | 0.02         | 80            | 5.4 (90 ± 1)        | 85 ± 1                                        | 170 ± 1                         |
| κC-g-PVAc    | 1: 2                                  | 0.02         | 70            | 4.6 (76 ± 1)        | 65 ± 1                                        | 130 ± 1                         |
| κC-g-PVAc    | <b>1: 2</b>                           | <b>0.02</b>  | <b>75</b>     | <b>5.2(87± 1)</b>   | <b>80 ± 1</b>                                 | <b>162 ± 1</b>                  |
| κC-g-PVAc    | 1: 2                                  | 0.02         | 80            | 5.3 (88 ± 1)        | 82 ± 1                                        | 165 ± 1                         |

<sup>a</sup>Based on the charged amount of phycocolloid and VAc; <sup>a</sup>glycerol was 0.5 wt%; <sup>b</sup>(Wt. of PVAc grafted/ wt. of κC) x 100; <sup>c</sup>(Wt. of PVAc grafted/ total wt. of VAc) x 100<sup>[15]</sup>

**Table S1d. Effect of reaction time on the grafting parameters.<sup>a</sup>**

| Product      | Weight ratios<br>(AgrGd: VAc,<br>w/w) | KPS<br>(wt%) | Time<br>(h) | Yield*<br>(g, %)    | % Grafting<br>efficiency<br>(%E) <sup>b</sup> | % Grafting<br>(%G) <sup>c</sup> |
|--------------|---------------------------------------|--------------|-------------|---------------------|-----------------------------------------------|---------------------------------|
| AgrGd-g-PVAc | 1: 2                                  | 0.02         | 4           | 4.5 (80 ± 1)        | 60 ± 1                                        | 120 ± 1                         |
| AgrGd-g-PVAc | <b>1: 2</b>                           | <b>0.02</b>  | <b>5</b>    | <b>5.3 (88 ± 1)</b> | <b>82 ± 1</b>                                 | <b>166 ± 1</b>                  |
| AgrGd-g-PVAc | 1: 2                                  | 0.02         | 6           | 5.3 (90 ± 1)        | 82 ± 1                                        | 165 ± 1                         |
| κC-g-PVAc    | 1: 2                                  | 0.02         | 4           | 4.3 (76 ± 1)        | 57 ± 1                                        | 115 ± 1                         |
| κC-g-PVAc    | <b>1: 2</b>                           | <b>0.02</b>  | <b>5</b>    | <b>5.2(87± 1)</b>   | <b>80 ± 1</b>                                 | <b>159 ± 1</b>                  |
| κC-g-PVAc    | 1: 2                                  | 0.02         | 6           | 5.1 (88 ± 1)        | 77 ± 1                                        | 155 ± 1                         |

<sup>a</sup>Based on the charged amount of phycocolloid and VAc; <sup>a</sup>glycerol was 0.5 wt%; <sup>b</sup>(Wt. of PVAc grafted/ wt. of κC) x 100; <sup>c</sup>(Wt. of PVAc grafted/ total wt. of VAc) x 100<sup>[15]</sup>

**Table S2. Effect of phycocolloids keeping constant vinyl acetate as monomer.\***

| Phycocolloid                        | Remarks/Observations                                                                                                                                                      |
|-------------------------------------|---------------------------------------------------------------------------------------------------------------------------------------------------------------------------|
| Agar from <i>G. acerosa</i> (AgrGa) | AgrGa-g-PVAc is flexible, water non-sensitive with good mechanical strength, and can be used for multiple applications including seaweed cultivation.                     |
| Agar from <i>G. dura</i> (AgrGd)    | <b>AgrGd-g-PVAc is flexible, water non-sensitive with greatest tensile (ca. 45 MPa) strength, and might be used for multi applications including seaweed cultivation.</b> |
| <i>Kappa</i> -carrageenan           | $\kappa$ C-g-PVAc is soften in water and having lower tensile (ca. 20 MPa) strength, might be used for multi applications excluding seaweed cultivation.                  |

\*Grafting was carried out under optimised reaction conditions [Phycocolloid concentration = 4 wt%; KPS concentration = 0.02 wt%; Reaction temperature = 75 °C; Reaction time = 5 h]

**Table S3. Effect of monomers keeping constant *G. dura* agar (AgrGd) as phycocolloid.\***

| Phycocolloid | Monomer used (wt%)          | Observations                                                                                                                                                                                                                                      |
|--------------|-----------------------------|---------------------------------------------------------------------------------------------------------------------------------------------------------------------------------------------------------------------------------------------------|
| AgrGd        | Acrylamide (AAm) (8 wt%)    | Stability of AgrGd-g-PAAm was checked by swelling and solubility in water, it was highly hydrophilic (soluble in water) and water sensitive (swelled in water) thus not suitable to be used for aqueous applications such as seaweed cultivation. |
| AgrGd        | Acrylonitrile (ACN) (8 wt%) | Stability of AgrGd-g-PACN was checked by swelling and solubility in water, it was highly hydrophilic (soluble in water) and water sensitive (swelled in water) thus not suitable to be used for aqueous applications such as seaweed cultivation. |

\*Grafting was carried out under optimised reaction conditions [Phycocolloid concentration = 4 wt%; KPS concentration = 0.02 wt%; Reaction temperature = 75 °C; Reaction time = 5 h]

**Figure S2.** Swelling behavior of the control *AgrGd*,  $\kappa$ C, and polymeric material made of *AgrGd*-g-PVAc. <sup>a</sup>dispersion was started after 12 h in the control *AgrGd* and  $\kappa$ C, <sup>b</sup>no weight loss was observed in *AgrGd*-g-PVAc up to 10 day; <sup>c</sup>dispersion was started after 24 h in the  $\kappa$ C-g-PVAc.

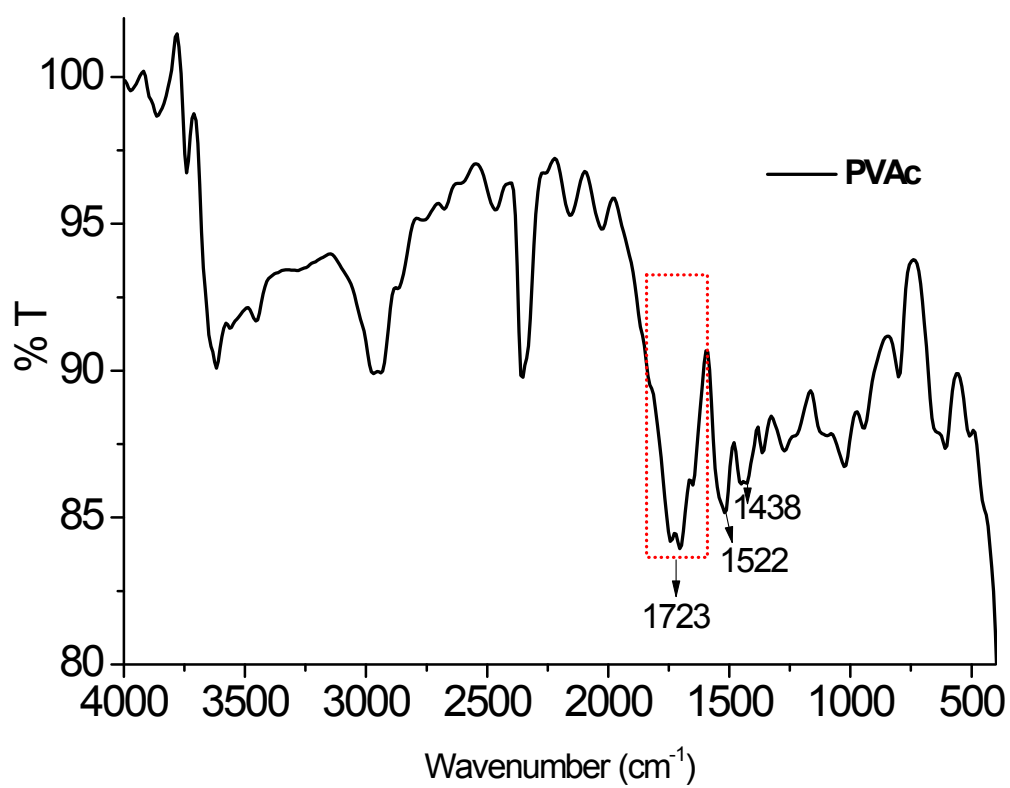

**Figure S3.** FTIR spectra of poly(vinyl acetate) (PVAc).

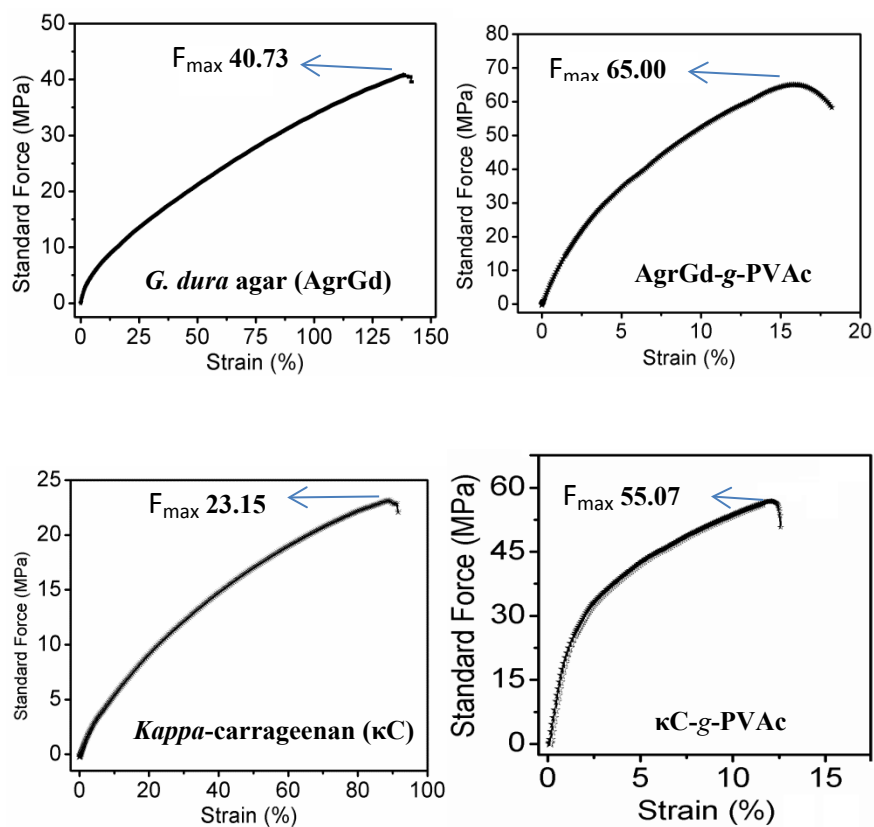

**Figure S4.** Tensile strength of (a) control agar, (b) AgrGd-g-PVAc, (c) control  $\kappa$ C, and (d)  $\kappa$ C-g-PVAc.



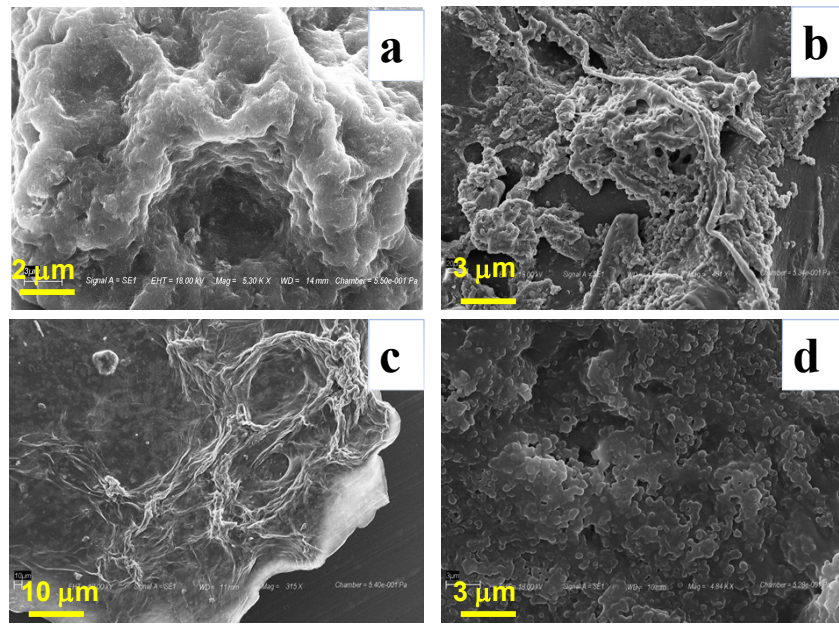

**Figure S5.** SEM images of (a) *G. dura* agar, (b) AgrGd-g-PVAc, (c) κC and (d) κC-g-PVAc.

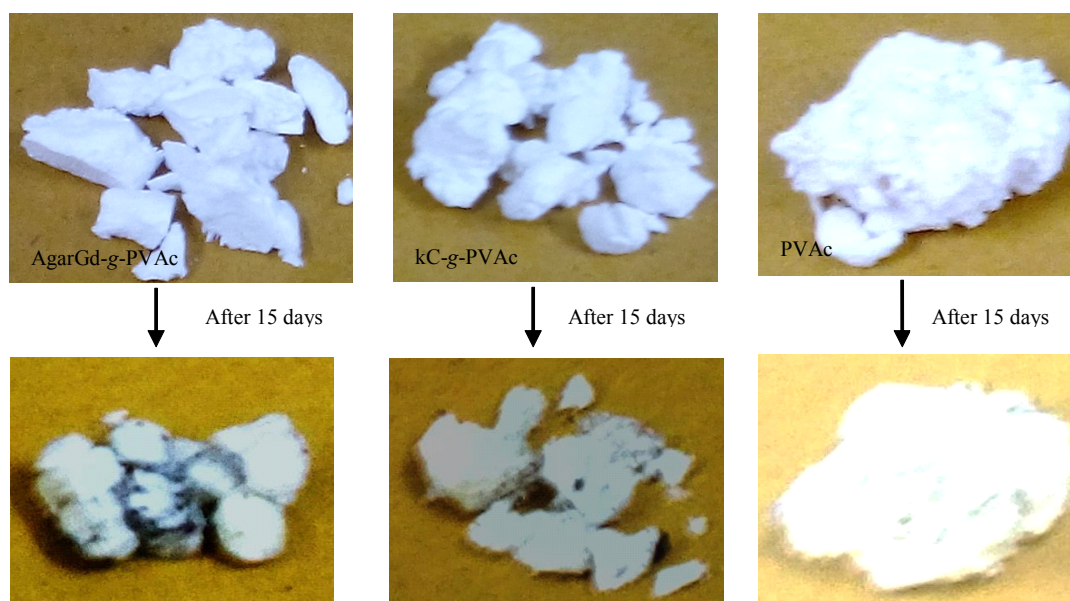

**Figure S6a.** Biodegradation of the control polyvinyl acetate (PVAc), grafted *Gracilaria dura* agar product (AgrGd-g-PVAc), and grafted carrageenan product (kC-g-PVAc) in soil conditions.

**Figure S6b.** Biodegradation of thin film prepared from grafted *Gracilaria dura* agar product (AgrGd-g-PVAc) in soil conditions.
